# Supplementary material for: Analysis of Spiritual Care Experiences of Acute-Care Hospital Nurses
Source: PubMed Central journal article supplement — Hanguk Hosupisu Wanhwa Uiryo Hakhoe Chi. 2020 Jun 1;23(2):44–54. doi: 10.14475/kjhpc.2020.23.2.44 (PMC10332717; doi:10.14475/kjhpc.2020.23.2.44), 2020-06-01
Supplement: KJHPC-23-039_Supple.pdf [file KJHPC-23-039_Supple.pdf]

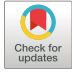

## 말기질환자와 가족을 위한 로고테라피적 접근

김미라

한국로고테라피연구소

## Finding Meaning in Life Threatening Illness

Mira Kim, Ph.D., RCC

The Viktor Frankl Institute of Logotherapy in Korea, Incheon, Korea

This paper aims to explore how to help terminally ill patients and their families find meaning in their suffering from the logotherapeutic perspective, which is the essence of palliative care. For this purpose, this paper examines the main concepts and principles of logotherapy, and specific approaches based on the logotherapeutic perspective to help terminally ill patients and their families find meaning in life are presented. Emphasizing the will to meaning as the primary motive to explain human behaviors and based on its unique perspective of the human being, which is called the dimensional ontology, logotherapy considers the human being to consist of the body, the mind, and the spirit. The dimensional ontology implies that the human being “has” the body and the mind, but the human being “is” the spirit itself. Therefore, even though a human being can be sick physically or psychologically, Accordingly, it is essential to help these patients realize that they are not their illnesses, but just have them, and to rise above themselves to reach out toward something meaningful or someone to love; despite their suffering, they can still do something meaningful, even in a small way. Above all, the most important thing for these patients is to acknowledge that they have already lived a meaningful life and to believe that their meaningful work has been safely preserved in the past and nothing can take it from them, for as spiritual beings, their lives have been meaningful unconditionally.

**Key Words:** Psychotherapy, Spirituality, Palliative Care

Received April 28, 2020

Revised May 9, 2020

Accepted May 9, 2020

**Correspondence to**

Mira Kim

ORCID: <https://orcid.org/0000-0002-4489-7265>

4489-7265

E-mail: mirak@twu.ca

### 서론

비엔나 3대 심리치료학파로 알려진 로고테라피(logotherapy)를 창시한 빅터프랭클(Viktor E. Frankl) 박사는 인간의 피할 수 없는 삶의 경험을 고통, 죄책감, 죽음이라는 삶의 3대 비극이라고 정의하였다[1]. 삶의 3대 비극은 유한한 존재인 인간이라면 누구나 겪을 수밖에 없는 삶의 필연적인 숙명이지만, ‘무조건적인 삶의 의미’라고 하는 개념을 통해 인간은 비극에도 불구하고

여전히 삶의 의미를 찾고 완성할 수 있는 의미를 추구하는 존재로 바라보았다[2].

“삶의 의미를 아는 사람은 삶의 어떠한 고통과 시련도 견디어 낼 수 있다”라고 하는 철학자 니체의 말은 삶의 3대 비극을 인간이 피하거나 통제할 수는 없지만, 만약 그러한 비극들 안에 숨겨져 있는 의미를 발견하거나 혹은 지금 당장 그 의미를 발견하지는 못한다 하더라도 있다고 믿을 수 있다면 인간은 비극에 대해 긍정적이고 창조적인 태도변화를 통해서 삶의 비극을 극복하고

가치 있는 삶을 살 수 있는 존재라고 하는 로고테라피의 의미 있는 삶과 삶을 살아가는 인간에 대한 관점을 대변해준다[1].

삶의 고통 중에서 존재론적으로 가장 극심한 고통은 죽음이전에 경험하게 되는 ‘죽어감(dying)’에 대한 인식일 것이다[3]. 보다 정확히 표현하자면 ‘죽어감’이라는 경험을 통해 가지게 되는 죽음에 대한 공포는 아마도 인간이 경험할 수 있는 가장 극심한 고통 중에 하나일 것이다. 죽음이 공포스러운 것에는 여러 가지 이유가 있겠지만 죽음에 대한 공포의 밑바닥에는 무엇보다도 죽음의 순간 모든 것이 ‘무(nothing)’가 되어 버린다는 근원적인 공포감이 깔려 있다[4]. 죽음 앞에서 가장 많이 하는 질문이 바로 ‘삶의 의미’에 대한 질문이라고 하는 사실은 죽음과 동시에 모든 것이 아무것도 아닌 것이 되어버릴 것이라는 삶의 허무와 죽음에 대한 공포를 증명해준다. 지금까지 내 삶은 정말 의미가 있었는가? 있었다면 내 삶의 의미는 무엇인가? 죽음은 인간의 모든 소유(having)를 존재(being)로 바꾸면서 가장 강력하게 삶의 의미에 대한 질문을 이끌어 낸다[5].

빅터프랭클 박사는 삶의 3대 비극에 대해 언급하면서 죽음의 마지막 순간까지 인간에게는 여전히 의미가 있다는 점을 강조하였다. 심지어 죽음을 통해 인간은 진정한 자신의 모습과 만나게 되고, 죽음을 통해 인간의 삶은 온전히 완성된다고 말하였다[1]. 따라서 니체의 말처럼 죽음이냐고 하는 고통 앞에서라도 만약 인간이 왜라고 하는 삶의 이유를 발견하고 믿을 수 있다면, 혹은 자신의 삶이 이미 얼마나 의미 있었는가를 확인할 수 있다면 인간은 죽음과 죽어감에 대한 인식을 통해서 자신의 삶을 온전히 완성할 수 있는 기회를 가질 수 있을 것이다. 죽음이라고 하는 물리적인 현실은 극복할 수는 없지만, 죽음을 통해서 진정으로 삶을 완성할 수 있게 될 것이다. 죽음은 고통과 죄책감을 넘어서 미처 살아내지 못한 삶의 의미를 발견하도록 하는 가장 강력한 자극이기 때문이다. 실제 삶의 의미는 삶의 의미는 이와 같이 치료가 불가능한 것처럼 보이는 말기질환으로 고통을 경험하고 있는 환자들에게 신체적, 심리적인 긍정적인 영향을 통해 고통을 경감시켜주는 것은 물론 절망감으로 인한 자살을 예방할 수 있게 도와주며, 더 나아가 의미발견을 통해 임박할지도 모르는 죽음을 준비하고 이를 존엄하게 맞이함으로써 죽음을 진정한 삶의 완성으로 이끄는 중요한 역할을 한다고 할 수 있다[6,7]. 따라서 삶의 의미는 말기질환자를 돌보는 완화의료에 있어서 반드시 고려해야 하는 매우 중요한 요소라고 할 수 있겠다.

## 본론

그렇다면 말기질환으로 고통을 경험하고 있는 환자들 자신의 삶의 의미를 확신하고 발견할 수 있도록 어떻게 도울 것인가. 또

한 말기질환자들의 곁을 지키면서 고통을 함께 나누고 있는 가족들은 어떻게 환자들이 삶의 의미를 찾을 수 있도록 조력하고 자신의 삶의 의미 또한 발견할 수 있는 기회를 가질 수 있도록 도울 수 있을 것인가.

빅터프랭클 박사는 이를 위해 무엇보다 자신이 진정으로 어떤 존재인지에 대한 이해가 우선되어야 한다고 말한다[1].

로고테라피는 기존의 심리치료와는 전혀 다른 인간 본성에 대한 세계관을 통해서 의미를 추구하는 존재로서의 인간에 대한 믿음을 강조하면서 인간행동의 1차적인 동기를 정신분석의 쾌락에 의의지나 개인심리학의 권력에의 의지에 대별하여 의미에의 의지(will to meaning)으로 설명하고 있다[1,2,8,9].

모든 심리치료이론이 제시하고 있는 인간행동의 동기는 모두 인간에 대한 세계관을 기반으로 하고 있다[1]. 로고테라피 역시 의미에의 의지를 인간을 움직이는 1차적인 동기로 설명하면서 인간에 대한 세계관을 제시하고 있는데, 인간을 몸과 마음의 2차원의 존재로 정의하고 있는 여타의 심리치료이론과 달리 인간을 몸과 마음을 넘어서 영의 존재로 정의하고 있다. 이와 같이 3차원의 존재로서의 인간을 바라보는 세계관을 차원적 존재론(Dimensional Ontology)이라고 한다[2]. 차원적 존재론에 따르면 총체적인 존재로서의 인간의 몸과 마음 그리고 영은 서로 분리될 수 없으며, 무엇보다 인간의 몸과 마음은 영의 차원을 통해 하나로 통합된다는 관점을 제시하고 있다. 따라서 영적 존재로서의 인간에 대해 온전히 이해하지 못한다면 인간은 자신이 진정으로 어떤 존재인지 이해할 수 없다. 무엇보다 빅터프랭클 박사는 ‘가진 것(having)’과 ‘존재하는 것(being)’ 간의 차이를 명확히 하였다. 그에 따르면 몸과 마음은 인간이 ‘가지고 있는 것(having)’인 반면, 영은 인간 ‘존재 자체(being)’라는 것이다. 따라서 가지고 있는 몸과 마음은 가지고 있는 것이기 때문에 잃어버릴 수 있고, 세상 속에서 살아가면서 상처받거나 아플 수 있지만, 존재 자체인 영은 잃어버릴 수도 아플 수도 상처받을 수도 없는 인간 존재의 본질이라는 것이다. 또한 이러한 인간은 종교의 유무나 종파와는 상관없이 본질적으로 아프거나 상처받지 않는 영적 존재라는 점을 강조한다[2]. 따라서 아프지 않고 상처받을 수 없는 영적 존재인 인간은 몸이나 마음이 아프고 상처받더라도 영원히 상처받거나 아프지 않은 존재이며, 이러한 영이 모든 치유와 성장의 자원이라는 점을 강조하였다. 따라서 아무리 몸과 마음이 아프다 하더라도 아프지 않은 영적 존재로서의 인간에게는 언제나 희망이 있으며, 어떤 고통에서도 설사 죽음조차도 영적 존재로서의 인간을 소멸시킬 수 없다[1,2,10].

위에서 언급한 것처럼 말기질환으로 고통을 경험하고 있는 환자 자신은 물론 치료하는 의료진을 비롯한 환자를 돌보는 가족들에게 있어서 영적 존재로서의 인간에 대한 세계관은 그 무엇

보다 중요하다고 할 수 있다. 로고테라피의 차원적 존재론에 따르면 비록 말기질환이라는 병으로 극심한 고통 중에 있더라도 말기질환이라는 병이 환자의 존재자체는 아니며, 말기 질환이라는 병은 환자가 ‘가지고 있는 것’이지 결코 환자의 존재자체가 될 수 없다. 예를 들어 암이 환자의 존재자체는 아니다. 환자는 암이라고 하는 병을 가지고 암의 증상으로 고통을 경험하고 있지만, 환자자체가 암은 아닌 것이다. 이와 같이 가지고 있는 것(having)과 존재 자체(being)를 구분할 수 있는 인간 능력을 빅터프랭클 박사는 인간의 ‘자기와 거리두기(Self-Distancing)’ 능력이라고 정의하고 있다[1]. 빅터프랭클 박사는 의미발견의 과정에서 무엇보다 중요한 것은 바로 이와 같이 자신의 고통과 자기 자신을 떨어뜨릴 수 있는 능력이 필수적이라는 점을 강조한다[1]. 고통과 자기 자신을 떨어뜨릴 수 있을 때 인간은 비로서 고통을 향한 자신의 태도를 결정할 수 있을 것이다. 인간은 고통뿐 아니라 죽어감이라고 하는 자신이 ‘가지고 있는 경험’으로부터 존재 자체인 자기 자신을 떨어뜨릴 수 있게 됨으로써 보다 객관적으로 고통과 죽음을 바라볼 수 있게 된다.

자기와 거리두기라고 하는 인간만의 고유한 능력과 더불어 빅터프랭클 박사는 자기초월적인 존재로서의 인간을 강조하고 있다[1]. 자기초월성이란 인간이 자기 자신을 넘어서 어떤 의미 있는 대의나 사랑하는 사람을 향해 나아갈 수 있는 인간만의 고유한 능력을 말한다. 빅터프랭클 박사는 인간의 자기초월성을 인간 존재의 핵심이라고 정의하고 있다[2]. 자기초월성이 인간존재의 핵심이라는 말은 인간은 자기초월성이 인간존재를 결정한다는 뜻이다. 그러나 한편 이 말은 또한 인간존재는 본성적으로 자기초월적인 존재로 타고 났다는 의미를 담고 있다. 따라서 인간은 자기 중심적이고 이기적일 때가 아니라 자기를 넘어서려 할 때 가장 기쁘고 행복한 존재가 될 수 있다는 것이다. 이는 빅터프랭클 박사가 앞서 인간의 행동을 의미에의 의지로 설명하는 것과 관련이 있다. 의미에의 의지란 바로 자기초월성의 한 단면으로써 인간이 본질적으로 타고난 본성이라는 뜻을 담고 있으며, 자기 초월성이 내가 아닌 의미 있는 어떤 것이나 타인을 향하는 것이듯 의미 역시 나라고 하는 주관성을 벗어난 객관적 의미로의 의지로 설명할 수 있다. 자기초월적인 의미에의 의지를 통해 인간은 삶의 진정한 의미를 추구하고 이를 통해 진정으로 행복하고 기쁠 수 있는 존재이다[4].

삶을 살아가는 동안 우리는 태어남과 죽음 사이에 수많은 결정들을 해왔다. 이러한 결정 속에서 선택의 기준이 된 것은 바로 ‘의미’이다. 우리는 크고 작은 선택의 순간에 자신에게 가장 의미 있다고 생각되는 대안을 선택한다. 의미라고 번역되는 로고스(logos)는 발견하는 것이라고 로고테라피에서는 정의하고 있다[1]. 발견한다는 말속에는 이미 존재한다라고는 가정이 전제되어

있다. 빅터프랭클 박사는 인간에게는 누구나 남녀노소에 상관없이, 민족이나 국가, 교육수준에 상관없이 누구에게나 그 사람만의 고유한 삶의 의미가 있다고 말하고 있다. 또한 삶의 최악의 상황에서도 인간은 무조건적으로 그 순간에 숨겨져 있는 의미를 발견할 수 있다고 한다[2]. 삶의 의미는 무조건적으로 존재하고 있기 때문이다. 그러나 문제는 인간의 선택이다. 자유롭게 선택하고 결정할 수 있는 존재로서의 인간이 고통스러운 상황의 희생자가 될 것인지 아니면 고통스러운 상황 속에서도 그 상황에 무조건적으로 존재하고 있는 의미를 발견할 것인지 하는 것은 인간의 결정에 달려 있다. 로고테라피에 따르면 인간은 세상으로부터 받은 것에 의해 결정되는 존재가 아니라 세상으로부터 받은 것에 대해서 어떻게 반응할 것인가에 의해 결정되는 존재이다. 나치수용소에서 3년 동안의 최악의 상황에서도 빅터프랭클 박사는 자기 자신과 함께 수용소에 수감되어 있었던 동료들을 통해서 인간이 수용소라고 하는 최악의 환경에 의해 결정되는 존재가 아니라 자신의 자유로운 선택에 의해 돼지가 될 것인가 성자가 될 것인가를 결정하는 존재라는 것을 확인하였다[4]. 세상으로부터 받은 것, 유전적 기질, 주어진 환경, 어린 시절의 트라우마, 피할 수 없는 고통, 치유가 불가능한 질병 등과 같이 세상으로부터 받은 내가 통제할 수 없었던 것들이 내가 어떤 사람이 될 것인가를 결정하는 것이 아니라, 이러한 것들에 대해서 내가 어떻게 반응하는가, 어떠한 태도를 취하는가 하는 것이 내가 어떤 존재가 될 것인가 하는 것을 결정한다는 것이다[1].

환자 자신이 말기질환이라는 병이 존재가 아니듯이 환자는 어떠한 상황에서도 치료가 불가능한 불치의 병에 함몰되어 삶에 좌절하고 절망하는 불치의 병이라고 하는 수용소의 희생자가 아니라 자신이 처한 상황에 어떻게 반응할 것인가를 통해 여전히 삶의 의미를 발견할 수 있는 자유로운 결정의 존재인 것이다. 의미를 발견할 수 있다면 여전히 수용소에서도 인간은 희망적인 존재가 될 수 있다. 고통이 인간을 절망스럽게 하는 것이 아니다. 고통 자체 때문이 아니라 고통의 이유와 의미를 발견하지 못하기 때문에 절망하는 것이다[8]. 의미의 부재가 바로 절망의 원인인 것이다. 그러나 만약 고통 중에 의미를 발견할 수 있다면 혹은 반드시 의미가 있다고 믿을 수 있다면 인간은 절망하지 않고 희망할 수 있을 것이다.

빅터프랭클 박사는 의미발견의 방법을 창조적 가치, 경험적 가치 그리고 태도적 가치의 세가지로 설명하고 있다[2]. 창조적 가치란 세상에 주는 것, 즉 세상에서 어떤 행위를 함으로써 의미를 발견하는 것을 말하며, 경험적 가치란 세상으로부터 받은 것, 즉 세상 속에서 접하게 되는 다양한 만남을 통해 의미를 발견하는 것을 말한다. 사랑하는 사람과의 만남, 자연과의 만남, 예술이나 문화와의 만남, 혹은 신과의 만남과 같은 경험을 통해 인간은 의

미를 발견할 수 있다. 그 다음으로 빅터프랭클 박사는 태도적 가치를 의미를 발견할 수 있는 길로 제시하였는데, 창조적 가치나 경험적 가치보다 어렵고 따라서 가장 우위에 있는 의미발견의 길이라고 소개하였다[2]. 태도적 가치란 바로 삶의 3대 비극인 고통과 죄책감 그리고 죽음에 대해 어떤 태도를 취하느냐를 통해서 의미를 발견하는 것이다. 로고테라피에 따르면 인간은 피할 수 없는 숙명 같은 고통을 인간성취와 승리로 바꿀 수 있는 긍정적이고 창조적인 존재이며, 죄책감을 통해서 성숙의 삶으로 나아갈 수 있는 영적 존재이고, 죽음에 대한 인식을 통해서 삶의 유한성과 일시성을 인식함으로써 현재 가장 중요한 것이 무엇인지 깨닫고 행동할 수 있는 자유로운 선택의 존재라고 정의하고 있다. 무엇보다 고통과 죄책감과 더불어 죽음은 내 안에 있었지만 미처 발견하지 못하고 살아내지 못했던 삶의 의미를 발견할 수 있도록 하는 기회를 준다. 따라서 앞서 설명한 바와 같이 삶의 3대 비극은 삶의 의미의 가장 강력한 자극인 것이다.

말기질환으로부터 고통을 경험하고 있는 환자 또한 예외 없이 고통을 인간승리와 성취로 바꿀 수 있는 긍정적이며 창조적인 존재이며, 영적 존재이고 자유롭게 반응할 수 있는 결정하고 선택할 수 있는 존재이다. 창조적 가치를 통해 발견할 수 있는 삶의 의미란 어떤 대단한 삶의 업적이나 과업일 필요는 없다. 고통 중에서도 세상을 향하는 따뜻한 미소, 따뜻한 감사의 한마디, 고통 중에 있는 다른 사람들을 향한 동병상련의 마음, 이것이 바로 의미인 것이다. 경험적 가치를 통해서 인간은 무엇보다 관계 속에서 자신이 얼마나 유일한 존재인가를 확인함을 통해서 의미를 발견할 수 있다. 대체할 수 없는 유일한 존재로서의 자신에 대한 인식은 그 동안 보지 못했던 삶의 의미를 더욱 증진시켜준다[4]. 말할 것도 없이 고통 자체가 되어 고통의 희생자가 되는 것이 아니라 상황과 처지는 바꿀 수 없다 하더라도 여전히 바꿀 수 있는 고통을 향한 태도변화를 통해서 의미를 발견하는 작업은 특히 말기질환으로 고통을 경험하고 있는 환자에게 의미를 발견할 수 있도록 돕는 가장 적극적인 의미발견의 길일 것이다.

## 결론

앞서 로고테라피의 기본적인 개념들과 원칙들을 통해서 말기질환으로 고통을 경험하고 있는 환자들이 의미를 발견할 수 있는 길에 대해 몇 가지 제시하였다. 물론 앞서 제시한 바와 같이 새롭게 의미를 발견하는 것도 중요하겠지만, 이보다 더욱 중요한 것은 살아온 삶을 돌아봄으로써 자신의 삶이 아무리 고통과 역경의 삶이었다 하더라도 여전히 의미 있는 삶이었다는 것을 재확인할 수 있도록 돕는 것일 것이다.

로고테라피는 미래지향적인 심리치료로서 고통 속에 숨겨져 있

는 의미를 발견할 수 있도록 돕고 이러한 의미발견을 통해서 치유와 성장을 도모하고자 하는 것을 1차적인 목표로 하고 있다. 그러나 빅터프랭클 박사는 미래가 성취되어야 하는 잠재적인 의미로 가득한 보물창고라면, 과거는 이미 살아온 삶의 의미들이 하나도 사라지지 않고 영원이 보존되는 의미의 저장소라고 정의하였다[4]. 과거 속에 저장되어 있는 의미는 그 누구도 빼앗을 수 없고 훼손할 수 없다. 죽음조차도 개인의 삶 속에 저장되어 있는 의미를 빼앗을 수 없으며 과거라는 저장소에 영원히 보존되는 것이다. 영적 존재로서의 인간이 그 어떤 것에 의해 상처받거나 훼손될 수 없듯이 과거 속에 살아온 삶의 의미는 아무리 사소한 것이라고 결코 사라질 수 없는 것이다. 따라서 말기질환으로 고통을 경험하고 있는 환자가 새롭게 창조적 가치를 통해 삶의 의미를 발견할 수 없다 하더라도, 새로운 만남의 경험적 가치를 통해서 삶의 의미를 발견하기 어렵다 하더라도 자신의 질병과 죽음에 대해 쉽게 태도를 바꾸어 고통과 죽음에서 의미를 발견하기 힘들더라도, 이미 살아온 삶을 되돌아볼 수 있는 기회를 통해서 과거 속에 영원히 저장되어 있는 의미 있는 삶의 자기 자신을 발견할 수 있도록 도울 수 있다. 유일하고 고유한 존재로서 이미 살아온 자신만의 유일하고 고유한 의미를 확인함을 통해서 마지막 순간까지 여전히 의미 있는 존재로서의 자신에 대한 희망을 놓지 않을 수 있을 것이다.

또한 고통과 죽음 앞에서 의미 있는 삶을 발견하고 있는 환자들을 돌보고 있는 가족들 역시 영적 존재로서의 인간본성에 대한 본질적인 이해를 통해서 환자를 질병이 아닌 한 존재로 바라보는 것이 필요하며, 지난 삶 속에서 의미 있었던 순간들을 발견할 수 있도록 조력함으로써 자신 또한 삶의 의미를 돌아보고 발견할 수 있는 기회를 가질 수 있을 것이다. 인간은 마지막 숨을 거두는 순간까지 삶의 의미를 발견할 수 있으며, 너나 할 것 없이 고통과 자신자신을 분리하고, 자신을 넘어서서 세상의 의미 있는 대상으로 향함으로써 어떤 순간에도 의미를 발견할 수 있는 아픈 적도 상처받은 적도 없고, 앞으로도 아프지 않고 상처받지 않을 영적인 존재임을 잊어서는 안 될 것이다.

## 요약

본 논문에서는 로고테라피의 관점에서 어떻게 말기질환의 환자와 가족들이 의미를 찾을 수 있도록 도울 것인가에 관해 논의하였다. 우선 삶의 의미가 말기질환자들의 신체적 그리고 심리적 안녕에 긍정적인 영향을 미친다는 연구결과를 간단히 살펴보고, 로고테라피의 기본적인 개념과 원리를 통해 말기질환자들과 가족들의 의미발견에의 몇 가지 방안을 제시하였다. 이를 통해 말기질환의 환자를 돌봄에 있어서 삶의 의미의 중요성을 상기하고

자 한다.

의미에의 의지를 쾌락에의 의지와 권력에의 의지와 대별하여 인간행동에 대한 1차적 동기로 설명하고 있는 로고테라피는 차원적 존재론이라고 하는 인간에 대한 세계관에 바탕을 두고 있다. 차원적 존재론은 인간을 몸과 마음 그리고 영의 3차원의 떨어뜨릴 수 없는 총체적인 존재로 정의하고 있다. 특히 몸과 마음은 인간이 '가지고 있는 것'이지만, 영은 인간존재 자체임으로 가지고 있는 몸과 마음은 잃어 버릴 수도 있고, 아프거나 상처받을 수 있으나, 영은 잃어버릴 수도 아플 수도 상처받을 수도 없는 인간존재 자체라는 점을 강조한다. 따라서 말기질환자들이 의미를 발견하는데 있어서 가장 중요한 출발점은 자신이 몸과 마음이 아프지만 영적으로는 아프지 않은 존재라고 하는 인식이라 하겠다.

자기와 거리두기 자기초월이라고 하는 로고테라피의 중요한 두 개념은 환자로 하여금 자신이 질병 자체가 아니라고 인식할 수 있게 도와줄 수 있고, 이를 통해 환자는 자기 자신을 넘어서 여전히 의미를 향해 나아갈 수 있게 된다. 비록 몸은 아프지만, 여전히 자신은 삶의 의미를 발견할 수 있는 존재임을 인식하는 것이 중요하다고 하겠다. 로고테라피에서는 의미를 발견에 있어서 창조적 가치와 경험적 가치를 넘어 태도적 가치의 중요성을 강조하

고 있는데, 이는 고통, 죄책감, 죽음과 같은 3대비극에 대해 인간은 여전히 태도를 수정함을 통해서 삶의 의미를 발견할 수 있다 (비극적 낙관주의). 그러나 환자들에게 있어서 새롭게 의미를 발견하는 것보다 더욱 중요한 것은 자신이 영적 존재로서 이미 의미 있는 삶을 살았다는 것을 확인하는 것이다. 죽음과 함께 모든 것이 사라지는 것이 아니라 과거라는 시간 속에 영원히 안전하게 보존된다는 것에 대해 확신하는 것이다. 환자를 돌보는 가족들에게 영적존재로서의 인간에 대한 세계관이 필요하며, 비록 새롭게 의미를 발견할 수 없더라도 환자들이 자신의 삶을 돌아봄을 통해서 이미 살아온 삶의 의미를 재확인할 수 있도록 격려하며, 가족 또한 삶의 의미를 확인하고 발견하는 기회를 가질 수 있을 것이다. 삶의 의미는 무조건적으로 이미 존재하고 있기 때문이다.

**중심단어:** 심리치료, 영적, 완화의료

## CONFLICT OF INTEREST

No potential conflict of interest relevant to this article was reported.

## REFERENCES

1. Frankl VE. The will to meaning: foundations and applications of logotherapy. New York: The New American Library; c1984.
2. Frankl VE. The doctor and the soul: from psychotherapy to logotherapy. New York: Vintage; 1986.
3. Bush AD. Transcending loss : understanding the lifelong impact of grief and how to make it meaningful. New York: Berkley Books; 1997.
4. Frankl VE. The feeling of meaninglessness: a challenge to psychotherapy and philosophy. Milwaukee, Wis.: Marquette University Press, cop; 2010.
5. Kovacs G. The question of death in logotherapy. Int Forum Logotherapy 1982;5:3-8.
6. Breitbart WS, Poppito S. Individual meaning-centered psychotherapy for patients with advanced cancer: a treatment manual. [New York]: Oxford University Press; 2014.
7. Stewart AL, Teno J, Patrick DL, Lynn J. The concept of quality of life of dying persons in the context of health care. J Pain Symptom Manage 1999;17: 93-108.
8. Frankl VE. Man's search for meaning: an introduction to logotherapy. New York: Pocket Books; c1963.
9. Frankl VE. The unheard cry for meaning: psychotherapy and humanism. New York: Simon and Schuster; c1978.
10. Frankl VE. The unconscious God: psychotherapy and theology. New York: Simon and Schuster; c1975.
